# Supplementary material
Source: PubMed Central journal article supplement (PMC8669731)
Supplement: mmc1.pdf [file mmc1.pdf]

**TÍTULO:** CEFALEA PERSISTENTE TRAS EL COVID-19: Fisiopatología, clínica y tratamiento.

**TÍTULO:** CEFALEA PERSISTENTE TRAS EL COVID-19: Fisiopatología, clínica y tratamiento.

**AUTORES:** Javier A. Membrilla MD<sup>a</sup>, Edoardo Caronna MD<sup>c,d</sup>, Javier Trigo López MD<sup>e</sup>, Alicia González Martínez MD<sup>f</sup>, Almudena Layos-Romero MD<sup>g</sup>, Patricia Pozo-Rosich PhD<sup>c,d</sup>, Ángel Guerrero-Peral PhD, Ana Beatriz Gago-Veiga PhD<sup>f</sup>, Alberto Andrés López MD<sup>h</sup>, Javier Díaz de Terán MD<sup>a,b</sup>.

<sup>a</sup> Unidad de Cefaleas Complejas y Dolor Neuropático, Servicio de Neurología. Hospital Universitario La Paz, Madrid.

<sup>b</sup> Instituto de Investigación Biosanitaria del Hospital Universitario La Paz, IdiPAZ, Madrid.

<sup>c</sup> Servicio de Neurología. Hospital Universitario Vall d'Hebron, Departamento de Medicina, Universidad Autónoma de Barcelona, Barcelona.

<sup>d</sup> Grupo de Investigación en Cefalea y Dolor Neurológico, Instituto de Investigación Vall d'Hebron, Departamento de Medicina, Universidad Autónoma de Barcelona, Barcelona.

<sup>e</sup> Unidad de Cefaleas, Servicio de Neurología. Hospital Clínico Universitario de Valladolid, Valladolid.

<sup>f</sup> Hospital Universitario de La Princesa e Instituto de Investigación Sanitaria La Princesa. Facultad de Medicina, Universidad Autónoma de Madrid, Madrid.

<sup>g</sup> Hospital General Universitario de Albacete, Albacete.

<sup>h</sup> Hospital General de Almansa, Almansa, Albacete.

**AUTOR DE CORRESPONDENCIA:** Javier Díaz de Terán ([javierddt@gmail.com](mailto:javierddt@gmail.com)).

**RESUMEN:** El SARS-CoV-2 (Síndrome Respiratorio Agudo Grave – Coronavirus 2) es el virus responsable de la pandemia por la Enfermedad por el Coronavirus de 2019 (COVID-19). La fase aguda de la enfermedad se caracteriza no sólo por síntomas respiratorios, sino que el cuadro clínico puede estar acompañado de múltiples síntomas sistémicos, incluyendo los neurológicos. Entre ellos, la cefalea es una queja frecuente. A medida que avanza la pandemia y crece la población de pacientes que se recuperan del COVID-19, se está observando que la cefalea presente en la fase aguda de la infección puede persistir durante un periodo de tiempo indeterminado, convirtiéndose un problema capital para el paciente y llegando a condicionar discapacidad. En esta revisión proporcionamos información acerca de los aspectos fisiopatológicos y clínicos de la cefalea persistente tras el COVID-19 en base a la información disponible en la literatura actual y la experiencia clínica de los autores.

**PALABRAS CLAVE:** Cefalea, SARS-COV-2, COVID-19, Post-COVID, COVID persistente, Cefalea diaria persistente de novo.

**ABREVIATURAS:** SARS-CoV-2: Síndrome Respiratorio Agudo Grave – Coronavirus 2, COVID-19: Enfermedad por el Coronavirus de 2019, ICHD-3: Clasificación Internacional de Cefaleas 3ª edición, ECA2: Enzima Convertidora de la Angiotensina tipo 2, CGRP: Péptido Relacionado con el Gen de la Calcitonina, CDPN: Cefalea Diaria Persistente de Novo.

**FINANCIACIÓN:** Los autores no han recibido ayudas específicas al respecto de esta investigación proveniente de agencias del sector público, comercial o entidades sin ánimo de lucro.

**AGRADECIMIENTOS:** A los investigadores, clínicos y otros profesionales sanitarios que trabajan para superar el COVID-19 y sus consecuencias.

**TITLE:** PERSISTENT HEADACHE AFTER COVID-19: Pathophysiology, clinic and treatment.

**ABSTRACT**

SARS-CoV-2 (severe acute respiratory syndrome - Coronavirus 2) is the virus responsible for the 2019 Coronavirus Disease pandemic (COVID-19). The acute phase of the disease is characterized not only by respiratory symptoms, but the clinical picture may be accompanied by multiple systemic symptoms, including neurological ones. Among these, headache is a frequent complaint. As the pandemic progresses and the population of patients recovering from COVID-19 grows, it is being observed that the headache present in the acute phase of the infection may persist for an indeterminate period, becoming a major problem for the patient and even leading to disability. In this review we provide information about the pathophysiological and clinical aspects of persistent headache after COVID-19 based on the information available in the current literature and the clinical experience of the authors.

**KEY WORDS:** Headache, SARS-COV-2, COVID-19, Long COVID, New daily persistent headache.

**FUNDING:** The authors have received no specific support for this research from public sector agencies, commercial or non-profit organizations.

**ACKNOWLEDGMENTS:** To the researchers, clinicians and other health professionals working to overcome COVID-19 and its consequences.

## **1. CONCEPTO DE LA CEFALEA PERSISTENTE TRAS COVID-19. MECANISMOS DE ENFERMEDAD.**

El SARS-CoV-2 (Síndrome Respiratorio Agudo Grave – Coronavirus 2 por sus siglas en inglés) es un nuevo coronavirus que surgió en China a finales de 2019 y que es responsable de la denominada Enfermedad por Coronavirus de 2019 (COVID-19). El COVID-19 se caracteriza por síntomas respiratorios que pueden llegar a insuficiencia respiratoria con necesidad de soporte ventilatorio invasivo. Sin embargo, desde el inicio de la pandemia a principios de 2020, otros síntomas han sido descritos en la fase aguda de la infección: neurológicos, gastrointestinales, renales y hematológicos, entre otros<sup>1</sup>. Dentro de los neurológicos, la cefalea ha sido un hallazgo común<sup>2-5</sup>.

Desde el inicio de la pandemia se observó que algunos pacientes, aunque hubiesen superado la fase aguda, presentaban síntomas persistentes y/o complicaciones tardías del COVID-19. Los síntomas más frecuentemente descritos son cefalea, alteración cognitiva, insomnio, fatiga y mareo<sup>6,7</sup>, denominándose “síndrome post-COVID”. Aunque a día de hoy faltan datos epidemiológicos sobre el post-COVID, es probable que tanto por su prevalencia como por el grado de discapacidad que parece capaz de generar en la población, podría llegar a representar un problema de salud pública a nivel global en el futuro inmediato. Entre los síntomas de este síndrome, la cefalea persistente se está convirtiendo en un motivo de consulta cada vez más frecuente en las Unidades de Cefalea. El objetivo de este trabajo es revisar la fisiopatología y las manifestaciones clínicas de la cefalea persistente tras la infección por COVID-19, así como aportar recomendaciones sobre el manejo de estos pacientes.

Se han formulado diversas hipótesis sobre la fisiopatología de la cefalea en el contexto de la fase aguda del COVID-19. Algunos de estos mecanismos, tanto inespecíficos como específicos en relación al SARS-CoV-2, podrían estar involucrados en la persistencia de la cefalea tras la fase aguda de la enfermedad. Sin embargo, a día de hoy, la ausencia de datos científicos unívocos

hace que muchas de las hipótesis fisiopatológicas sobre la cefalea post-COVID sigan siendo conflictivas.

Entre los mecanismos inespecíficos se encuentra, por ejemplo, la inflamación sistémica, que en contexto de la fase aguda del COVID-19 puede llegar a ser tan grande que se ha definido como “tormenta de citoquinas”<sup>8</sup>. Se ha planteado que durante la fase aguda mediadores inflamatorios circulantes podrían llegar a activar a nivel meníngeo el sistema trigémino-vascular y producir cefalea. Tras la infección, no se puede descartar que algunos pacientes puedan presentar una respuesta inflamatoria mantenida y que esta pueda estar involucrada en la persistencia de los síntomas post-COVID como la cefalea. Un estudio reciente ha detectado niveles elevados de citoquinas proinflamatorias entre 3 y 9 meses después del alta hospitalaria en pacientes con también síntomas persistentes tras el COVID-19 comparado con controles sanos<sup>9</sup>. Sin embargo, estos hallazgos no han sido confirmados por otros estudios<sup>10,11</sup>. Otra opción es que los pacientes que hayan experimentado un mayor grado de inflamación en la fase aguda puedan haber activado de forma persistente el sistema trigémino-vascular. Esta hipótesis, sin embargo, no explicaría el hecho de que la cefalea post-COVID es común en pacientes que tuvieron un COVID-19 más leve. Por lo tanto, el rol de la inflamación sistémica en el post-COVID resulta aún motivo de debate y aclarar este aspecto de la fisiopatología del post-COVID es especialmente relevante considerado que la inflamación refleja la activación de mecanismos inmunes concretos. En este contexto, algunos autores postulan que la persistencia de síntomas en el post-COVID pueda estar relacionada con una activación inmune constante<sup>12</sup>. No se puede descartar que este fenómeno podría estar favorecido por la presencia de antígenos del SARS-CoV-2 que persisten en algunos tejidos a pesar de no aislarse ya el virus a nivel nasofaríngeo<sup>13</sup>. Otros autores apoyan la existencia de mecanismos autoinmunes generados contra epítomos del huésped en la fase aguda de la infección<sup>14</sup>. Sin embargo, la relación entre inmunidad y estos síntomas, incluyendo la cefalea, no está suficientemente estudiada a día de hoy.

Por otro lado, no se puede tampoco descartar la presencia de mecanismos de inflamación local involucrados en la cefalea post-COVID. En concreto, cierta inflamación podría localizarse y persistir a nivel de sistema nervioso como secuela de los mecanismos directos de daño viral que se han producido durante la fase aguda de la infección. En el caso de la cefalea, el daño podría producirse a nivel trigémino-vascular por diferentes vías. El coronavirus parece tener capacidad de neurotropismo a través de la vía transináptica<sup>15,16</sup>. Otra posibilidad está representada por la diseminación sanguínea del virus hasta las meninges, que facilitaría la inflamación local del endotelio (endotelitis) y la alteración de la barrera hematoencefalica<sup>17</sup> con posibilidad de activación del sistema trigémino-vascular. En ambos casos, un paso previo sería la invasión del epitelio respiratorio por parte del SARS-CoV-2 empleando la enzima convertidora de la angiotensina tipo 2 (ECA2) como receptor<sup>18</sup>. Esta enzima se encuentra presente en las células epiteliales de la mucosa nasal, aunque no se encuentra en las terminaciones nerviosas del primer nervio craneal<sup>19</sup>. Sin embargo, el RNA del SARS-CoV-2 se ha detectado recientemente no solamente en la mucosa olfatoria, sino también en el bulbo olfatorio y en el nervio trigémino (incluyendo terminaciones nerviosas en la conjuntiva, la córnea y la mucosa que recubre la úvula, así como en el ganglio de Gasser)<sup>20</sup>. Este hallazgo apoya este mecanismo como vía de activación del sistema trigeminovascular por afectación directa de las ramas del trigémino. Por otro lado, la presencia de ECA2 en los vasos del cerebro humano<sup>21</sup> y la inmunorreactividad a proteínas del SARS-CoV-2 en las células endoteliales cerebrales y leptomeníngeas<sup>20</sup> apoyan la hipótesis de la lesión del endotelio meníngeo. Entonces, tras este daño ocurrido en la fase aguda, se activarían mecanismos inflamatorios locales, sobre todo a cargo de la microglia, que facilitarían la liberación continua de mediadores a nivel cerebral como glutamato, ácido quinolínico, interleucinas, proteínas del complemento y factor de necrosis tumoral  $\alpha$ <sup>22,23</sup>. Estos mediadores podrían perpetuar la activación del sistema trigémino-vascular y estar por lo tanto implicados en la persistencia de la cefalea.

Por último, cabe remarcar el potencial rol del péptido relacionado con el gen de la calcitonina (CGRP). Éste es liberado por las terminaciones nerviosas pulmonares durante una infección viral y participa en la regulación de la respuesta inmuno-inflamatoria<sup>24</sup>. Los niveles de CGRP están aumentados en migraña<sup>25</sup> y su infusión es capaz de generar ataques de migraña en personas con esta patología<sup>26</sup>. Un aumento de los niveles circulantes de CGRP podría generar cefalea en personas predispuestas en contexto del COVID-19 en la fase aguda. Si la activación del sistema trigémino-vascular se produjera de forma mantenida en la fase aguda, se podría generar una sensibilización central de las neuronas de segundo orden que podría estar implicada en la persistencia de la cefalea tras la infección, según un mecanismo similar a la progresión de migraña episódica a crónica<sup>27</sup>. Sin embargo, a día de hoy un único estudio ha intentado medir los niveles de CGRP en pacientes con y sin cefalea en la fase aguda del COVID-19, sin detectarse diferencias significativas en sus niveles entre grupos<sup>28</sup>, y otro ha observado niveles más bajos de CGRP en pacientes con COVID-19 comparado con controles<sup>29</sup>. Se necesitan entonces nuevos estudios para confirmar estos hallazgos y aclarar si el CGRP tiene un real papel en la cefalea asociada al COVID-19.

Por todo ello, el conocimiento que tenemos en la actualidad parece indicar que la cefalea persistente tras el COVID-19 podría reflejar la participación de diferentes y complejos mecanismos.

## **2. FENOTIPO CLÍNICO**

Tanto en la práctica clínica como en el ámbito de la investigación tiende a usarse el término de cefalea post-COVID o cefalea persistente tras el COVID-19 para hablar de cualquier cefalea de curso crónico cuyo inicio o empeoramiento parece tener relación temporal con una infección confirmada por SARS-CoV-2. Sin embargo, se han descrito diferentes patrones clínicos en relación al momento concreto de aparición de cefalea y su relación con los antecedentes

personales del paciente (la presencia o ausencia de una cefalea primaria previa al COVID-19) que conviene diferenciar<sup>30</sup>.

El primer patrón de cefalea tras el COVID-19 es la persistencia de la cefalea que aparece en la fase aguda, pese a la resolución del resto de síntomas del SARS-CoV-2<sup>30</sup>. La cefalea se presenta en la fase aguda del COVID-19 con una prevalencia variable entre el 13.0 y el 74.6%<sup>2-4,31,32</sup>. Los estudios que describen únicamente las características de pacientes hospitalizados suelen mostrar una menor prevalencia (13.0-22.6%<sup>4,31</sup>) que las investigaciones que incluyen pacientes candidatos a manejo ambulatorio (59.0-74.6%<sup>2,3,32</sup>). Este síntoma se encuentra presente desde el inicio de los síntomas del COVID-19 en el 81.8%<sup>3</sup>, en forma de una cefalea frontal bilateral (34.0-38.1%) u holocraneal (34.0-38.8%) y de calidad opresiva (70.1-73.7%). Más de la mitad experimentan un dolor moderado o grave (60.6-75.3%). Es frecuente que cada episodio de cefalea dure más de 24 horas, con casi la mitad de los pacientes experimentando dolor constante. En la mitad de los casos se experimenta un curso circadiano, principalmente describiéndose un empeoramiento vespertino (en el 24.2%). Como factores que agravan la intensidad del dolor se refieren la actividad física (12.37-45.5%) y la tos sin influencia de otras maniobras de Valsalva (43.4%). Asimismo, pueden asociarse fotofobia (10.3-29.3%) y sonofobia (10.3-27.3%). La aparición de síntomas trigémino-autonómicos es poco común (1.0%), habiéndose descrito ipsilaterales a una cefalea unilateral.

La historia personal de migraña tiene relevancia en la forma de presentación de los síntomas en la fase aguda y en su posible persistencia. De esta manera, el segundo patrón de cefalea persistente tras el SARS-CoV-2 corresponde al empeoramiento del dolor de una migraña en un paciente que ya la presentaba previamente al COVID-19, con cronificación de la misma<sup>30</sup>. El tercer patrón descrito es el de cefalea persistente y diaria en pacientes sin antecedentes personales de cefalea primaria, con el dolor iniciándose tras la resolución de la fase aguda del COVID-19 (sin existencia de cefalea durante la fase aguda).

Siguiendo los criterios de la ICHD-3 (ver Tabla 1), el primer patrón descrito podría corresponder con el diagnóstico de cefalea crónica atribuida a infección viral sistémica (código 9.2.2.2.). El segundo patrón podría corresponder al diagnóstico de migraña crónica (código 1.3) en el que el SARS-CoV-2 parece haber servido como factor de cronificación. En cuanto al tercer patrón (aparición de cefalea persistente diaria en ausencia de antecedentes personales de migraña ni cefalea durante la fase aguda del COVID-19) no se podría emitir el diagnóstico de cefalea atribuida a infección viral sistémica por ausencia de relación temporal entre el inicio de la cefalea y el inicio de los síntomas del COVID-19 y la ausencia de mejoría y empeoramiento del dolor de forma paralela a la evolución de los síntomas de la infección. Estos pacientes podrían clasificarse mejor como Cefalea Diaria Persistente de Novo (CDPN, código 4.10).

Aunque la verdadera prevalencia no sea conocida, en la literatura se han descrito casos de pacientes que cumplen los criterios diagnósticos de CDPN en pacientes que han superado la fase aguda del COVID-19<sup>33</sup>. Ya antes de la aparición del SARS-CoV-2, las principales series publicadas de CDPN habían descrito a las infecciones (principalmente cuadros virales sistémicos con síntomas respiratorios tipo gripe) como uno de los principales factores desencadenantes del inicio del dolor (14-43% de los casos)<sup>34</sup>. De manera similar, la cefalea persistente diaria se documentó como secuela en pacientes que superaban la fase aguda de la pandemia conocida como gripe rusa o gripe asiática de 1890<sup>35</sup>. Sin embargo, la CDPN está clasificada en la ICHD-3 como una cefalea primaria, por lo que cuando el inicio de la cefalea presenta relación temporal clara con un cuadro viral sistémico, ya sea COVID-19 o cualquier otro, el cuadro podría clasificarse mejor como cefalea crónica atribuida a infección viral sistémica. El diagnóstico de CDPN solo podría aplicarse, como se ha dicho anteriormente, cuando la aparición y el curso de la cefalea persistente no coincidan con los de la infección sistémica.

### **3. PRONÓSTICO: DURACIÓN Y FACTORES DE PERSISTENCIA**

La duración de la cefalea persistente tras la infección por SARS-COV-2 continúa siendo desconocida y serán necesarios nuevos estudios de seguimiento a largo plazo para poder aclarar su pronóstico. La literatura actual al respecto es escasa y se basa en algunos estudios de seguimiento a pacientes con sintomatología post-COVID19 evaluados en distintas fases. En este sentido destacan algunos estudios recientes<sup>36-38</sup> en los que se ha evaluado la prevalencia de distintos síntomas post-COVID en una primera fase a los 1,5-3 meses tras la infección aguda y en una segunda fase a los 6-9 meses. Respecto a la cefalea, los estudios no han mostrado un decremento de su prevalencia en dicho periodo y a los 6-9 meses se ha observado una persistencia entre el 10-37% de los pacientes. Por otra parte, en estos mismos pacientes sí se produjo una leve reducción de la mayoría del resto de síntomas post-COVID. Esto sugiere que la cefalea persistente también podría reducirse y ceder paulatinamente con el paso del tiempo, pero se requieren nuevos estudios con seguimiento a largo plazo para poder determinar su duración.

En cuanto a factores predictores, hasta el momento la mayoría de las investigaciones publicadas se han centrado en analizar al síndrome post-COVID en su global. Entre los escasos estudios que analizaron factores predictores específicos de cefalea persistente post-COVID destacan el hallazgo de una asociación significativa entre la presencia de cefalea en fase aguda de la enfermedad y persistencia de la misma (es poco frecuente que aparezca una cefalea persistente de novo tras el COVID-19 si no se ha presentado este síntoma en la fase aguda); mientras que el antecedente de migraña no se asoció a una mayor frecuencia de cefalea persistente<sup>39,40</sup>.

Si la cefalea persistente aparece de manera diferida a la resolución de la infección aguda y el paciente puede cumplir criterios diagnósticos de CDPN, en la ICHD-3 se indica que esta enfermedad pueden presentar dos tipos de curso: una forma autolimitada que se resuelve en unos meses y una forma de curso crónico y refractaria al tratamiento<sup>41</sup>. En los estudios

observacionales publicados, la frecuencia de cada uno de estos dos subtipos y la duración total del dolor en las formas de curso autolimitado son muy variables (66-78% de los pacientes diagnosticados de CDPN se encuentran libres de dolor a los 24 meses de seguimiento)<sup>34</sup>.

#### **4. INDICACIÓN DE PRUEBAS COMPLEMENTARIAS (SIGNOS DE ALARMA Y CEFALEAS SECUNDARIAS TRAS COVID-19)**

La indicación de una prueba de imagen ante la sospecha de una cefalea secundaria depende de la presencia de signos de alarma identificados a partir de una historia clínica detallada y de una exploración neurológica completa, ante la presencia de cefalea con características atípicas o “banderas rojas”<sup>42</sup>. Una de las herramientas creadas para aumentar la sospecha de causas secundarias es la lista “SNNOOP10” aplicable a pacientes con cefalea de nueva aparición<sup>43</sup>. En una serie de 104 pacientes con cefalea hospitalizados por COVID-19 que investigó directamente la presencia de signos de alarma, estos se encontraron en 79/104 (76%), siendo las principales banderas rojas la edad superior a 50 años, la fiebre, la exacerbación del dolor con la tos y la elevación de proteína C reactiva<sup>31</sup>. La tabla 2 recoge los principales signos de alarma que presentaron en este estudio los pacientes con COVID-19 de entre aquellos incluidos en la lista SNOOP10. No se han publicado estudios que valoren la frecuencia de los signos de alarma en pacientes con cefalea una vez superada la fase aguda del COVID-19.

En los casos en los que un paciente con cefalea persistente post-COVID presente signos de alarma, la elección del tipo de prueba dependerá del diagnóstico de sospecha y de la disponibilidad del centro, siendo la resonancia magnética cerebral de elección la prueba de elección en cefaleas no agudas (grado de recomendación B, clase III)<sup>41</sup>. Hasta la fecha no se han publicado estudios que describan la incidencia de anomalías específicas en pruebas de neuroimagen en pacientes con COVID-19 y cefalea. La punción lumbar deberá valorarse en casos de cefalea en los que se sospeche infección del sistema nervioso central o cefalea

atribuida a alteraciones de la presión intracraneal en los que se descarte la presencia de una lesión ocupante de espacio.

Se han publicado varios casos de pacientes con cefalea secundaria en el contexto de infección aguda por SARS-CoV-2, llegando al diagnóstico a través de la realización de pruebas de neuroimagen y/o análisis del líquido cefalorraquídeo (ver Tabla 3). Hasta el momento no se han publicado casos de cefalea secundaria una vez superada la fase aguda.

## **5. TRATAMIENTO SINTOMÁTICO Y PREVENTIVO**

En estos momentos disponemos de escasa evidencia respecto a las mejores opciones terapéuticas. Sin embargo, proponemos algunas medidas que, según la experiencia clínica de los autores, pueden resultar de utilidad.

En los casos en los que el COVID-19 actúe como un factor que exacerba una cefalea primaria previa proponemos utilizar tratamientos sintomáticos y preventivos individualizados a las características del paciente y de su cefalea, según las recomendaciones de las guías oficiales<sup>44</sup>.

El abordaje terapéutico de los pacientes que cumplen criterios diagnósticos de cefalea crónica atribuida a infección viral sistémica o CDPN es más desafiante. En estos casos, la elección del tratamiento preventivo dependerá del fenotipo clínico, según sea más próximo al de la migraña o al de la cefalea tipo tensión. De esta manera, ante casos de fenotipo de cefalea tipo tensión se podría plantear como primera opción el tratamiento con amitriptilina; otras opciones podrían ser venlafaxina o mirtazapina. Si el paciente se presenta con una cefalea de características migrañosas, podría beneficiarse de tratamientos orales clásicos como los betabloqueantes, neuromoduladores, antidepresivos, antagonistas de canales de calcio o IECA/ARA II. En este grupo, debemos ser especialmente cuidadosos con las alteraciones anímicas y del sueño, que, en algunos casos, se han visto agravadas a causa del estrés generado por las dificultades familiares, laborales y socioeconómicas que esta pandemia ha traído consigo y que pueden empeorar la vivencia del dolor (la flunarizina y los betabloqueantes se han relacionado con la

aparición o exacerbación de un síndrome depresivo). Asimismo, habrá que tener en cuenta que fármacos como el topiramato pueden provocar efectos secundarios sobre la cognición que podrían ser más relevantes en aquellos casos con quejas subjetivas de memoria o deterioro cognitivo leve en el contexto del cuadro de post-COVID. En este sentido, teniendo en cuenta la diversa comorbilidad frecuentemente asociada a estos pacientes, el uso de OnabotulinumtoxinA (155 o 195 unidades siguiendo el paradigma PREEMPT<sup>45</sup>) es una opción especialmente interesante a tenor de su excelente perfil de seguridad y tolerancia. Los bloqueos anestésicos de nervios pericraneales podrían también constituir una terapia adyuvante de interés. En el caso del uso de estos procedimientos se debe de garantizar la seguridad de los pacientes con medidas de asepsia, higiene de superficies, distancia interpersonal y de protección del médico y del paciente según las recomendaciones oficiales<sup>46</sup>. Recomendaciones generales como mantener hábitos de vida regulares, realizar ejercicio físico y evitar ayuno prolongado siguen teniendo cabida en la cefalea persistente tras la infección por SARS-CoV-2. Recomendamos mantener el tratamiento preventivo un mínimo de 4-6 semanas antes de definir ausencia de respuesta y por tanto valorar la posibilidad de recurrir a otro grupo farmacológico. En caso de resultar efectivo, proponemos mantener el tratamiento de 3 a 6 meses.

Por último, este grupo de pacientes tienen un elevado riesgo de cefalea por uso excesivo de medicación<sup>44</sup>, por lo que les deberemos informar correctamente acerca de esta enfermedad y cómo evitarla. Para el tratamiento de las crisis leves, los antiinflamatorios no esteroideos pueden emplearse con seguridad, incluido ibuprofeno<sup>47</sup>, una vez han sido superadas las primeras informaciones que dudaban de su seguridad por su posible interacción en la sobreexpresión de la ECA. El uso de triptanes se debe valorar en las indicaciones habituales. Con la descripción del papel del receptor de la enzima ECA en la entrada del virus SARS-CoV-2 a las células humanas, se hipotetizó un posible papel facilitador en sujetos consumidores de inhibidores de la ECA o antagonistas del receptor de angiotensina II. Dicho fenómeno no ha sido

demostrado y la recomendación de las principales sociedades científicas es mantener estos fármacos cuando han sido eficaces en el tratamiento preventivo de la migraña<sup>47</sup>.

## 6. CONCLUSIÓN

Los mecanismos que originan la cefalea persistente tras el COVID-19 son, a día de hoy, desconocidos. Clínicamente, la cefalea en la fase aguda suele presentar como un dolor holocraneal o bifrontal con calidad opresiva e intensidad moderada-grave, con frecuente asociación de características migrañosas. Los factores predictores de persistencia de cefalea una vez superada la fase aguda de la enfermedad no son conocidos. Algunos pacientes con cefalea persistente tras el COVID-19 pueden cumplir criterios diagnósticos de CDPN. Es necesaria la realización de pruebas complementarias cuando se sospeche una etiología secundaria tras la anamnesis y el examen clínico. A día de hoy no existen datos que proporcionen evidencia acerca de la mejor forma de tratar a estos pacientes, de forma general se recomienda indicar tratamiento en base al fenotipo clínico.

## Material suplementario.

## TABLAS

Tabla 1. Criterios diagnósticos de la 3ª edición de la *International Classification of Headache Disorders* (ICHD-3) para el diagnóstico de cefalea crónica atribuida a infección viral sistémica, cefalea diaria persistente de novo y migraña crónica.

| Cefalea crónica atribuida a infección viral sistémica (9.2.2.2)             | Cefalea atribuida a infección viral sistémica (9.2.2) | Cefalea diaria persistente de novo (4.10)              | Migraña crónica (1.3)                                           |
|-----------------------------------------------------------------------------|-------------------------------------------------------|--------------------------------------------------------|-----------------------------------------------------------------|
| A. Cefalea que cumple los criterios diagnósticos 9.2.2. Cefalea atribuida a | A. Cefalea de cualquier duración que cumple el        | A. Cefalea persistente que cumple los criterios B y C. | A. Cefalea (tipo migraña o tipo tensional) durante ≥15 días/mes |

|                                                                                                                                                                                                                                     |                                                                                                                                                                                                                                                                                                                                                                                                                                                                                                                                                                                                                                                                                                                                                                                                                                                                                                                                                        |                                                                                                                                                                                                                                          |                                                                                                                                                                                                                                                                                                                                                                                                                                                                                                                                                                                                                                                  |
|-------------------------------------------------------------------------------------------------------------------------------------------------------------------------------------------------------------------------------------|--------------------------------------------------------------------------------------------------------------------------------------------------------------------------------------------------------------------------------------------------------------------------------------------------------------------------------------------------------------------------------------------------------------------------------------------------------------------------------------------------------------------------------------------------------------------------------------------------------------------------------------------------------------------------------------------------------------------------------------------------------------------------------------------------------------------------------------------------------------------------------------------------------------------------------------------------------|------------------------------------------------------------------------------------------------------------------------------------------------------------------------------------------------------------------------------------------|--------------------------------------------------------------------------------------------------------------------------------------------------------------------------------------------------------------------------------------------------------------------------------------------------------------------------------------------------------------------------------------------------------------------------------------------------------------------------------------------------------------------------------------------------------------------------------------------------------------------------------------------------|
| <p><i>infección viral sistémica</i>, y el criterio C a continuación.</p> <p>B. La infección sistémica viral se mantiene activa o se ha resuelto en los últimos 3 meses.</p> <p>C. La cefalea está presente durante &gt;3 meses.</p> | <p>criterio C a continuación.</p> <p>B. Ambos de los siguientes:</p> <ol style="list-style-type: none"> <li>1. Una infección sistémica viral ha sido diagnosticada</li> <li>2. No hay evidencia de meningitis o encefalitis</li> </ol> <p>C. Evidencia de causalidad dada por al menos dos de los siguientes:</p> <ol style="list-style-type: none"> <li>1. La cefalea de desarrolla en relación temporal con el inicio de la infección viral sistémica.</li> <li>2. La cefalea empeora significativamente en paralelo con el empeoramiento de la infección viral sistémica.</li> <li>3. La cefalea mejora o se resuelve en paralelo con la mejoría o resolución de la infección viral sistémica.</li> <li>4. La cefalea presenta al menos una de las siguientes características: <ul style="list-style-type: none"> <li>- Dolor difuso.</li> <li>- Intensidad moderada-grave.</li> </ul> </li> </ol> <p>D. El cuadro no se explica mejor por otro</p> | <p>B. Inicio definido y claramente recordado, con el dolor volviéndose continuo sin remisión en las primeras 24h.</p> <p>C. Presente durante &gt;3 meses.</p> <p>D. El cuadro no se explica mejor por otro diagnóstico de la ICHD-3.</p> | <p>por &gt;3 meses, cumpliendo los criterios B y C.</p> <p>B. Ocurre en un paciente que tiene al menos cinco ataques que cumplen los criterios B-D de 1.1 <i>Migraña sin aura</i> y/o el criterio B y C de 1.2. <i>Migraña con aura</i>.</p> <p>C. Durante ≥8 días/mes, se cumple cualquiera de los siguientes:</p> <ol style="list-style-type: none"> <li>1. Los criterios C y D de 1.1 Migraña sin aura.</li> <li>2. Los criterios B y C de 1.2. Migraña con aura.</li> <li>3. El paciente cree que es migraña y se alivia con un triptán o derivados ergóticos.</li> </ol> <p>D. Sin mejor explicación por otro diagnóstico de la ICHD-3.</p> |
|-------------------------------------------------------------------------------------------------------------------------------------------------------------------------------------------------------------------------------------|--------------------------------------------------------------------------------------------------------------------------------------------------------------------------------------------------------------------------------------------------------------------------------------------------------------------------------------------------------------------------------------------------------------------------------------------------------------------------------------------------------------------------------------------------------------------------------------------------------------------------------------------------------------------------------------------------------------------------------------------------------------------------------------------------------------------------------------------------------------------------------------------------------------------------------------------------------|------------------------------------------------------------------------------------------------------------------------------------------------------------------------------------------------------------------------------------------|--------------------------------------------------------------------------------------------------------------------------------------------------------------------------------------------------------------------------------------------------------------------------------------------------------------------------------------------------------------------------------------------------------------------------------------------------------------------------------------------------------------------------------------------------------------------------------------------------------------------------------------------------|

|  |                           |  |  |
|--|---------------------------|--|--|
|  | diagnóstico de la ICHD-3. |  |  |
|--|---------------------------|--|--|

Tabla 2 – Lista de signos de alarma SNOOP10 en pacientes con cefalea de nueva aparición. En **negrita** se resaltan aquellos descritos en pacientes con cefalea hospitalizados por COVID-19<sup>31</sup>.

|                                                       | Historia clínica                                                                                                                                                                                                                                                                                                                     | Exploración física                                          |
|-------------------------------------------------------|--------------------------------------------------------------------------------------------------------------------------------------------------------------------------------------------------------------------------------------------------------------------------------------------------------------------------------------|-------------------------------------------------------------|
| <u>S</u> istémico                                     | Historia previa de <b>cáncer</b> , <b>inmunosupresión</b> , riesgo de sangrado aumentado, virus de la inmunodeficiencia humana, síntomas como <b>fiebre</b> , pérdida de peso, sudoración nocturna, escalofríos, mialgia, claudicación mandibular o vómitos en escopetazo                                                            | Exploración física anormal incluyendo hipertensión y fiebre |
| <u>N</u> eurológico                                   | Síntomas o signos neurológicos tales como <b>confusión</b> , <b>deterioro del estado general</b> , cambios en el comportamiento o en la personalidad, crisis epilépticas, alteraciones visuales como diplopia, oscurecimientos transitorios, tinnitus, pulsátil, signos meníngeos, <b>alteraciones motoras</b> , sensitivas o ataxia | Exploración neurológica anormal                             |
| <u>O</u> nset: forma de inicio                        | <b>Súbito</b> /abrupto, segundos a minutos, rápido inicio de la cefalea o cefalea “en trueno” (máxima intensidad en menos de un minuto)                                                                                                                                                                                              |                                                             |
| <u>O</u> nset: edad                                   | Cefalea nueva o empeoramiento progresivo de la cefalea que inicia en pacientes menores de 5 o <b>mayores de 50 años</b>                                                                                                                                                                                                              |                                                             |
| <u>P</u> atrón de progresión                          | <b>Cambio en frecuencia, intensidad o en las características de la cefalea; ausencia de respuesta a tratamiento teóricamente correcto</b>                                                                                                                                                                                            |                                                             |
|                                                       | Precipitada por maniobras de <b>Valsalva</b>                                                                                                                                                                                                                                                                                         |                                                             |
|                                                       | Empeoramiento/precipitación con los <b>cambios posturales</b>                                                                                                                                                                                                                                                                        |                                                             |
| <u>P</u> apiledema                                    | Disminución de agudeza visual                                                                                                                                                                                                                                                                                                        | Papiledema                                                  |
| <u>P</u> regnancy (embarazo)                          | Inicio o cambio en la cefalea durante el embarazo                                                                                                                                                                                                                                                                                    |                                                             |
| <u>P</u> henotype: fenotipo de cefalea poco frecuente | Cefalea <b>trigémino-autonómica</b> , hípica, desencadenada por el <b>ejercicio</b> , <b>por la tos</b> o por la actividad sexual                                                                                                                                                                                                    |                                                             |

Tabla 3 – Casos reportados de cefaleas secundarias en contexto de infección por SARS-CoV-2.

RMN: Resonancia Magnética nuclear. TC: Tomografía Computarizada.

|                                                                                                                     | Sexo   | Edad | Cuadro clínico                                                                                                   | Prueba de imagen            |
|---------------------------------------------------------------------------------------------------------------------|--------|------|------------------------------------------------------------------------------------------------------------------|-----------------------------|
| Cefalea atribuida a meningitis vírica <sup>48,49</sup>                                                              | Hombre | 24   | Cefalea + fiebre                                                                                                 | RMN cerebral                |
| Cefalea atribuida a trombosis venosa cerebral <sup>50,51</sup>                                                      | Mujer  | 57   | Cefalea de novo + exploración neurológica anormal + crisis tónico-clónicas + alteración del nivel de consciencia | RMN cerebral con venografía |
| Cefalea atribuida a disección de arteria vertebral y síndrome de vasoconstricción cerebral reversible <sup>52</sup> | Mujer  | 30   | Cefalea en trueno                                                                                                | Angio-TC cerebral           |
| Cefalea atribuida a infección intracraneal por tuberculosis <sup>53</sup>                                           | Hombre | 28   | Cefalea de novo + vómitos                                                                                        | TC craneal y RMN cerebral   |

|                                                              |       |    |                                                                         |                           |
|--------------------------------------------------------------|-------|----|-------------------------------------------------------------------------|---------------------------|
| Cefalea atribuida a ictus isquémico cerebeloso <sup>54</sup> | Mujer | 32 | Cefalea + exploración neurológica anormal (mareo, nistagmo + dismetría) | TC craneal y RMN cerebral |
|--------------------------------------------------------------|-------|----|-------------------------------------------------------------------------|---------------------------|

## BIBLIOGRAFÍA

1. Hu, B., Guo, H., Zhou, P. & Shi, Z.-L. Characteristics of SARS-CoV-2 and COVID-19. *Nat. Rev. Microbiol.* **19**, 141–154 (2021).
2. Caronna, E. *et al.* Headache: A striking prodromal and persistent symptom, predictive of COVID-19 clinical evolution. *Cephalalgia* **40**, 1410–1421 (2020).
3. Membrilla, J. A., de Lorenzo, Í., Sastre, M. & Díaz de Terán, J. Headache as a Cardinal Symptom of Coronavirus Disease 2019: A Cross-Sectional Study. *Headache* **60**, 2176–2191 (2020).
4. Gonzalez-Martinez, A. *et al.* Headache during SARS-CoV-2 infection as an early symptom associated with a more benign course of disease: a case–control study. *Eur. J. Neurol.* 1–11 (2021) doi:10.1111/ene.14718.
5. Trigo, J. *et al.* Factors associated with the presence of headache in hospitalized COVID-19 patients and impact on prognosis: a retrospective cohort study. *J. Headache Pain* **21**, 94 (2020).
6. Nalbandian, A. *et al.* Post-acute COVID-19 syndrome. *Nat. Med.* **27**, 601–615 (2021).
7. Huang, C. *et al.* 6-month consequences of COVID-19 in patients discharged from hospital: a cohort study. *Lancet* **397**, 220–232 (2021).
8. Mehta, P. *et al.* COVID-19: consider cytokine storm syndromes and immunosuppression. *Lancet* **395**, 1033–1034 (2020).
9. Ahearn-Ford, S. *et al.* Long-term disruption of cytokine signalling networks is evident in patients who required hospitalization for SARS-CoV-2 infection. *Allergy* **76**, 2910–2913

(2021).

10. Salmon-Ceron, D. *et al.* Clinical, virological and imaging profile in patients with prolonged forms of COVID-19: A cross-sectional study. *J. Infect.* **82**, e1–e4 (2021).
11. Mandal, S. *et al.* ‘Long-COVID’: a cross-sectional study of persisting symptoms, biomarker and imaging abnormalities following hospitalisation for COVID-19. *Thorax* **76**, 396–398 (2021).
12. Files, J. K. *et al.* Duration of post-COVID-19 symptoms are associated with sustained SARS-CoV-2 specific immune responses. *JCI Insight* (2021) doi:10.1172/jci.insight.151544.
13. Gaebler, C. *et al.* Evolution of Antibody Immunity to SARS-CoV-2. *bioRxiv Prepr. Serv. Biol.* (2021) doi:10.1101/2020.11.03.367391.
14. Bhadelia, N. *et al.* Distinct Autoimmune Antibody Signatures Between Hospitalized Acute COVID-19 Patients, SARS-CoV-2 Convalescent Individuals, and Unexposed Pre-Pandemic Controls. *medRxiv* 2021.01.21.21249176 (2021) doi:10.1101/2021.01.21.21249176.
15. Dubé, M. *et al.* Axonal Transport Enables Neuron-to-Neuron Propagation of Human Coronavirus OC43. *J. Virol.* **92**, (2018).
16. Bergmann, C. C., Lane, T. E. & Stohlman, S. A. Coronavirus infection of the central nervous system: host–virus stand-off. *Nat. Rev. Microbiol.* **4**, 121–132 (2006).
17. Sarchielli, P. *et al.* Proinflammatory Cytokines, Adhesion Molecules, and Lymphocyte Integrin Expression in the Internal Jugular Blood of Migraine Patients Without Aura Assessed Ictally. *Headache J. Head Face Pain* **46**, 200–207 (2006).
18. Hoffmann, M. *et al.* SARS-CoV-2 Cell Entry Depends on ACE2 and TMPRSS2 and Is

Blocked by a Clinically Proven Protease Inhibitor. *Cell* **181**, 271-280.e8 (2020).

19. Brann, D. H. *et al.* Non-neuronal expression of SARS-CoV-2 entry genes in the olfactory system suggests mechanisms underlying COVID-19-associated anosmia. *Sci. Adv.* **6**, eabc5801 (2020).
20. Meinhardt, J. *et al.* Olfactory transmucosal SARS-CoV-2 invasion as a port of central nervous system entry in individuals with COVID-19. *Nat. Neurosci.* **24**, 168–175 (2021).
21. Hamming, I. *et al.* Tissue distribution of ACE2 protein, the functional receptor for SARS coronavirus. A first step in understanding SARS pathogenesis. *J. Pathol.* **203**, 631–637 (2004).
22. Vasek, M. J. *et al.* A complement–microglial axis drives synapse loss during virus-induced memory impairment. *Nature* **534**, 538–543 (2016).
23. Boldrini, M., Canoll, P. D. & Klein, R. S. How COVID-19 Affects the Brain. *JAMA Psychiatry* **78**, 682 (2021).
24. De Virgiliis, F. & Di Giovanni, S. Lung innervation in the eye of a cytokine storm: neuroimmune interactions and COVID-19. *Nat. Rev. Neurol.* **16**, 645–652 (2020).
25. Cernuda-Morollon, E. *et al.* Interictal increase of CGRP levels in peripheral blood as a biomarker for chronic migraine. *Neurology* **81**, 1191–1196 (2013).
26. Hansen, J. M., Hauge, A. W., Olesen, J. & Ashina, M. Calcitonin gene-related peptide triggers migraine-like attacks in patients with migraine with aura. *Cephalalgia* **30**, 1179–1186 (2010).
27. Iyengar, S., Johnson, K. W., Ossipov, M. H. & Aurora, S. K. CGRP and the Trigeminal System in Migraine. *Headache* **59**, 659–681 (2019).
28. Bolay, H. *et al.* HMGB1, NLRP3, IL-6 and ACE2 levels are elevated in COVID-19 with

- headache: a window to the infection-related headache mechanism. *J. Headache Pain* **22**, 94 (2021).
29. Ochoa-Callejero, L. *et al.* Circulating Levels of Calcitonin Gene-Related Peptide Are Lower in COVID-19 Patients. *J. Endocr. Soc.* **5**, bvaa199 (2021).
  30. Caronna, E., Alpuente, A., Torres-Ferrus, M. & Pozo-Rosich, P. Toward a better understanding of persistent headache after mild COVID-19: Three migraine-like yet distinct scenarios. *Headache J. Head Face Pain* **61**, 1277–1280 (2021).
  31. García-Azorín, D. *et al.* Frequency and Type of Red Flags in Patients With Covid-19 and Headache: A Series of 104 Hospitalized Patients. *Headache* **60**, 1664–1672 (2020).
  32. Poncet-Megemont, L. *et al.* High Prevalence of Headaches During Covid-19 Infection: A Retrospective Cohort Study. *Headache* **60**, 2578–2582 (2020).
  33. Sampaio Rocha-Filho, P. A. & Voss, L. Persistent Headache and Persistent Anosmia Associated With COVID-19. *Headache* **60**, 1797–1799 (2020).
  34. Yamani, N. & Olesen, J. New daily persistent headache: A systematic review on an enigmatic disorder. *J. Headache Pain* **20**, (2019).
  35. Rozen, T. D. Daily persistent headache after a viral illness during a worldwide pandemic may not be a new occurrence: Lessons from the 1890 Russian/Asiatic flu. *Cephalalgia* **40**, 1406–1409 (2020).
  36. Nehme, M., Braillard, O., Chappuis, F., Courvoisier, D. S. & Guessous, I. Prevalence of Symptoms More Than Seven Months After Diagnosis of Symptomatic COVID-19 in an Outpatient Setting. *Ann. Intern. Med.* (2021) doi:10.7326/M21-0878.
  37. Vaes, A. W. *et al.* Recovery from COVID-19: a sprint or marathon? 6-month follow-up data from online long COVID-19 support group members. *ERJ Open Res.* **7**, 00141–

02021 (2021).

38. Ghosn, J. *et al.* Persistent COVID-19 symptoms are highly prevalent 6 months after hospitalization: results from a large prospective cohort. *Clin. Microbiol. Infect.* **27**, 1041.e1-1041.e4 (2021).
39. Fernández-de-las-Peñas, C. *et al.* The presence of headache at onset in SARS-CoV-2 infection is associated with long-term post-COVID headache and fatigue: A case-control study. *Cephalalgia* 033310242110204 (2021) doi:10.1177/03331024211020404.
40. Fernández-de-las-Peñas, C. *et al.* Previous History of Migraine Is Associated With Fatigue, but Not Headache, as Long-Term Post-COVID Symptom After Severe Acute Respiratory SARS-CoV-2 Infection: A Case-Control Study. *Front. Hum. Neurosci.* **15**, (2021).
41. Headache Classification Committee of the International Headache Society (IHS). The International Classification of Headache Disorders, 3rd edition. *Cephalalgia* **38**, 1–211 (2018).
42. M, S., Lamont, A. C., Alias, N. A. & Win, M. N. Red flags in patients presenting with headache: clinical indications for neuroimaging. *Br. J. Radiol.* **76**, 532–535 (2003).
43. Do, T. P. *et al.* Red and orange flags for secondary headaches in clinical practice. *Neurology* **92**, 134–144 (2019).
44. Santos-Lasaosa, S. *et al.* *Manual de cefaleas de práctica clínica en cefaleas. Recomendaciones de la Sociedad Española de Neurología. Ediciones SEN* (2020).
45. Blumenfeld, A. *et al.* Method of Injection of OnabotulinumtoxinA for Chronic Migraine: A Safe, Well-Tolerated, and Effective Treatment Paradigm Based on the PREEMPT Clinical Program. *Headache J. Head Face Pain* **50**, 1406–1418 (2010).

46. Santos-Lasaosa, S. & Porta-Etessam, J. OnabotulinumtoxinA infiltration and nerve blocks in patients with headache and neuralgia: safety recommendations to prevent SARS-CoV-2 infection. *Neurologia* **35**, 291–294 (2020).
47. Maassenvandenbrink, A., De Vries, T. & Danser, A. H. J. Headache medication and the COVID-19 pandemic. *J. Headache Pain* **21**, 1–4 (2020).
48. Moriguchi, T. *et al.* A first case of meningitis/encephalitis associated with SARS-Coronavirus-2. *Int. J. Infect. Dis.* **94**, 55–58 (2020).
49. Huo, L., Xu, K.-L. & Wang, H. Clinical features of SARS-CoV-2-associated encephalitis and meningitis amid COVID-19 pandemic. *World J. Clin. Cases* **9**, 1058–1078 (2021).
50. Nwajei, F. *et al.* Cerebral Venous Sinus Thromboses in Patients with SARS-CoV-2 Infection: Three Cases and a Review of the Literature. *J. Stroke Cerebrovasc. Dis.* **29**, 105412 (2020).
51. Khazaei, M., Karimi, K., Sedighi, P. & Khazaei, S. Cerebral Sinus Thrombosis Secondary to SARS-CoV-2 Infection. *Case Rep. Neurol. Med.* **2021**, 1–5 (2021).
52. Dakay, K. *et al.* Reversible cerebral vasoconstriction syndrome and dissection in the setting of COVID-19 infection. *J. Stroke Cerebrovasc. Dis.* **29**, 105011 (2020).
53. Ata, F. *et al.* A 28-Year-Old Man from India with SARS-Cov-2 and Pulmonary Tuberculosis Co-Infection with Central Nervous System Involvement. *Am. J. Case Rep.* **21**, (2020).
54. Quenzer, F. *et al.* Large Cerebellar Stroke in a Young COVID-19–Positive Patient: Case Report. *J. Emerg. Med.* **61**, 29–36 (2021).
